# Supplementary material for: Comparative profiling of Chlorella vulgaris cells, extracts, and intact chloroplasts using electron transfer matrix-assisted laser desorption/ionization mass spectrometry (ET-MALDI-MS)
Source: Royal Society of Chemistry journal article supplement (doi:10.1039/d4ay00846d), 2024-01-01
Supplement: d4ay00846d1.pdf [file d4ay00846d1.pdf]

## Supporting Information

### Comparative Profiling of *Chlorella vulgaris* Cells, Extracts, and Intact Chloroplasts Using Electron Transfer Matrix-Assisted Laser Desorption/Ionization Mass Spectrometry (ET-MALDI-MS)

Luz A. Calderón-Vergara<sup>a\*</sup>, Luis M. Díaz-Sánchez<sup>a\*</sup>, Cristian Blanco-Tirado<sup>a</sup>, Marianny Y. Combariza<sup>a\*\*</sup>

<sup>a</sup>Escuela de Química, Universidad Industrial de Santander, Bucaramanga, Santander 680002, Colombia

\*These authors contributed equally

**Table S1** Compounds detected in *C. vulgaris* intact cells by ET MALDI-MS.

| Compound                       | Abbreviation                   | Ion type                                                                                          | <i>m/z Theo</i>                                                                  | MALDI MS       |                     |       |
|--------------------------------|--------------------------------|---------------------------------------------------------------------------------------------------|----------------------------------------------------------------------------------|----------------|---------------------|-------|
|                                |                                |                                                                                                   |                                                                                  | <i>m/z Exp</i> | Mass Accuracy (ppm) | S/N   |
| <b>Chlorophyll derivatives</b> |                                |                                                                                                   |                                                                                  |                |                     |       |
| Chlorophyll <i>b</i>           | Chld <i>b</i>                  | [C <sub>35</sub> H <sub>32</sub> MgN <sub>4</sub> O <sub>6</sub> ] <sup>++</sup>                  | 628.217                                                                          | 628.218        | 1.3                 | 38.1  |
|                                | Chl <i>b</i>                   | [C <sub>55</sub> H <sub>70</sub> MgN <sub>4</sub> O <sub>6</sub> ] <sup>++</sup>                  | 906.515                                                                          | 906.512        | 2.9                 | 15.6  |
|                                | Chl <i>b</i> -NH <sub>4</sub>  | [C <sub>55</sub> H <sub>70</sub> MgN <sub>4</sub> O <sub>6</sub> + NH <sub>4</sub> ] <sup>+</sup> | 924.549                                                                          | 924.539        | 10.8                | 8.7   |
| Pheophorbide <i>a</i>          | Phd <i>a</i>                   | [C <sub>35</sub> H <sub>36</sub> N <sub>4</sub> O <sub>5</sub> ] <sup>++</sup>                    | 592.269                                                                          | 592.267        | 3.4                 | 100.3 |
|                                | Chld <i>a</i> (II)             | [C <sub>30</sub> H <sub>25</sub> MgN <sub>4</sub> O] <sup>+</sup>                                 | 481.152                                                                          | 481.150        | 3.1                 | 59.7  |
| Chlorophyllide <i>a</i>        | Chld <i>a</i> (I)              | [C <sub>33</sub> H <sub>31</sub> MgN <sub>4</sub> O <sub>3</sub> ] <sup>+</sup>                   | 555.225                                                                          | 555.229        | 7.7                 | 7.2   |
|                                | Chld <i>a</i>                  | [C <sub>35</sub> H <sub>34</sub> MgN <sub>4</sub> O <sub>5</sub> ] <sup>++</sup>                  | 614.238                                                                          | 614.239        | 1.6                 | 245.0 |
| Pheophytin <i>a</i>            | Phtn <i>a</i>                  | [C <sub>55</sub> H <sub>74</sub> N <sub>4</sub> O <sub>5</sub> ] <sup>++</sup>                    | 870.566                                                                          | 870.568        | 2.2                 | 16.6  |
|                                | Phtn <i>a</i> -Cu              | [C <sub>55</sub> H <sub>72</sub> N <sub>4</sub> O <sub>5</sub> Cu] <sup>++</sup>                  | 931.480                                                                          | 931.485        | 5.6                 | 25.1  |
| Chlorophyll <i>a</i>           | Chl <i>a</i>                   | [C <sub>55</sub> H <sub>72</sub> MgN <sub>4</sub> O <sub>5</sub> ] <sup>++</sup>                  | 892.535                                                                          | 892.534        | 1.5                 | 90.1  |
|                                | [7-hydroxymethyl]-Chl <i>a</i> | [7-hyd]-Chl <i>a</i>                                                                              | [C <sub>55</sub> H <sub>72</sub> MgN <sub>4</sub> O <sub>6</sub> ] <sup>++</sup> | 908.530        | 908.530             | 0.2   |
| <b>Carotenoids</b>             |                                |                                                                                                   |                                                                                  |                |                     |       |
| Lutein                         | Lut                            | [C <sub>40</sub> H <sub>56</sub> O <sub>2</sub> ] <sup>++</sup>                                   | 568.428                                                                          | 568.431        | 5.3                 | 33.3  |
| <b>Lipids</b>                  |                                |                                                                                                   |                                                                                  |                |                     |       |
| Phosphatidylcholine            | PC(14:0/18:1)                  | [C <sub>40</sub> H <sub>80</sub> NO <sub>7</sub> P + K] <sup>+</sup>                              | 756.531                                                                          | 756.536        | 6.7                 | 16.0  |
| Glycosylceramide               | GlcCer(15:2/22:0)              | [C <sub>43</sub> H <sub>81</sub> NO <sub>8</sub> + K] <sup>+</sup>                                | 778.560                                                                          | 778.559        | 0.6                 | 12.7  |

**Table S2** Compounds detected in *C. vulgaris* intact chloroplasts by ET MALDI-MS.

| Compound                       | Abbreviation                   | Proposed Formula                                                                 | <i>m/z Theo</i>                                                                  | MALDI MS       |                     |      |
|--------------------------------|--------------------------------|----------------------------------------------------------------------------------|----------------------------------------------------------------------------------|----------------|---------------------|------|
|                                |                                |                                                                                  |                                                                                  | <i>m/z Exp</i> | Mass accuracy (ppm) | S/N  |
| <b>Chlorophyll derivatives</b> |                                |                                                                                  |                                                                                  |                |                     |      |
| Chlorophyllide <i>b</i>        | Chld <i>b</i>                  | [C <sub>35</sub> H <sub>32</sub> MgN <sub>4</sub> O <sub>6</sub> ] <sup>++</sup> | 628.217                                                                          | 628.221        | 6.1                 | 10.3 |
| Chlorophyll <i>b</i>           | Chl <i>b</i>                   | [C <sub>55</sub> H <sub>70</sub> MgN <sub>4</sub> O <sub>6</sub> ] <sup>++</sup> | 906.515                                                                          | 906.512        | 2.9                 | 6.9  |
| Pheophorbide <i>a</i>          | Phd <i>a</i>                   | [C <sub>35</sub> H <sub>36</sub> N <sub>4</sub> O <sub>5</sub> ] <sup>++</sup>   | 592.269                                                                          | 592.273        | 7.4                 | 44.8 |
| Chlorophyllide <i>a</i>        | Chld <i>a</i> (I)              | [C <sub>30</sub> H <sub>25</sub> MgN <sub>4</sub> O] <sup>+</sup>                | 481.152                                                                          | 481.155        | 7.3                 | 10.1 |
|                                | Chld <i>a</i>                  | [C <sub>35</sub> H <sub>34</sub> MgN <sub>4</sub> O <sub>5</sub> ] <sup>++</sup> | 614.238                                                                          | 614.233        | 8.1                 | 41.0 |
| Pheophytin <i>a</i>            | Phtn <i>a</i>                  | [C <sub>55</sub> H <sub>74</sub> N <sub>4</sub> O <sub>5</sub> ] <sup>++</sup>   | 870.566                                                                          | 870.562        | 4.5                 | 65.3 |
| Chlorophyll <i>a</i>           | Chl <i>a</i>                   | [C <sub>55</sub> H <sub>72</sub> MgN <sub>4</sub> O <sub>5</sub> ] <sup>++</sup> | 892.535                                                                          | 892.533        | 2.6                 | 27.4 |
|                                | [7-hydroxymethyl]-Chl <i>a</i> | [7-hyd]Chl <i>a</i>                                                              | [C <sub>55</sub> H <sub>72</sub> MgN <sub>4</sub> O <sub>6</sub> ] <sup>++</sup> | 908.530        | 908.526             | 4.6  |
| <b>Carotenoids</b>             |                                |                                                                                  |                                                                                  |                |                     |      |
| Lutein                         | Lut                            | [C <sub>40</sub> H <sub>56</sub> O <sub>2</sub> ] <sup>++</sup>                  | 568.428                                                                          | 568.427        | 1.8                 | 4.7  |
| Loroxanthin                    | Lor                            | [C <sub>40</sub> H <sub>56</sub> O <sub>3</sub> ] <sup>++</sup>                  | 584.423                                                                          | 584.420        | 5.0                 | 3.3  |
| <b>Lipids</b>                  |                                |                                                                                  |                                                                                  |                |                     |      |
| Ceramide                       | Cer(18:0/16:0)                 | [C <sub>34</sub> H <sub>69</sub> NO <sub>4</sub> + H] <sup>+</sup>               | 556.531                                                                          | 556.536        | 9.9                 | 4.5  |

**Table S3** Compounds detected in *C. vulgaris* UAE extract by MALDI MS.

| Compound                       | Abbreviation        | Proposed formula                                                                                   | <i>m/z Theo</i>                                                       | MALDI MS       |                     |       |
|--------------------------------|---------------------|----------------------------------------------------------------------------------------------------|-----------------------------------------------------------------------|----------------|---------------------|-------|
|                                |                     |                                                                                                    |                                                                       | <i>m/z Exp</i> | Mass accuracy (ppm) | S/N   |
| <b>Chlorophyll pigments</b>    |                     |                                                                                                    |                                                                       |                |                     |       |
| Pheophorbide <i>a</i>          | Phd <i>a</i>        | [C <sub>35</sub> H <sub>36</sub> N <sub>4</sub> O <sub>5</sub> ] <sup>+</sup> **                   | 592.268                                                               | 592.266        | 3.4                 | 54.7  |
| Chlorophyllide <i>a</i>        | Chld <i>a</i>       | [C <sub>35</sub> H <sub>34</sub> N <sub>4</sub> O <sub>5</sub> Mg] <sup>+</sup> **                 | 614.237                                                               | 614.232        | 8.1                 | 7.7   |
| Pheophytin <i>a</i>            | Phtn <i>a</i>       | [C <sub>55</sub> H <sub>74</sub> N <sub>4</sub> O <sub>5</sub> ] <sup>+</sup> **                   | 870.565                                                               | 870.566        | 1.1                 | 169.9 |
| [7-hydroxymethyl]-Chl <i>a</i> | [7-Hyd]Chl <i>a</i> | [C <sub>55</sub> H <sub>72</sub> N <sub>4</sub> O <sub>6</sub> Mg] <sup>+</sup> **                 | 908.530                                                               | 908.525        | 5.5                 | 19.2  |
|                                |                     | [C <sub>55</sub> H <sub>72</sub> N <sub>4</sub> O <sub>6</sub> Mg + H] <sup>+</sup>                | 909.538                                                               | 909.528        | 11.0                | 19.4  |
|                                |                     | [C <sub>55</sub> H <sub>70</sub> N <sub>4</sub> O <sub>6</sub> Mg] <sup>+</sup> **                 | 906.514                                                               | 906.499        | 16.5                | 12.7  |
| Chlorophyll <i>b</i>           | Chl <i>b</i>        | [C <sub>55</sub> H <sub>70</sub> N <sub>4</sub> O <sub>6</sub> Mg + NH <sub>4</sub> ] <sup>+</sup> | 924.548                                                               | 924.533        | 16.2                | 10.6  |
|                                |                     | [C <sub>55</sub> H <sub>72</sub> N <sub>4</sub> O <sub>5</sub> Mg] <sup>+</sup> **                 | 892.535                                                               | 892.535        | 0.1                 | 42.0  |
| Chlorophyll <i>a</i>           | Chl <i>a</i>        | [C <sub>55</sub> H <sub>72</sub> N <sub>4</sub> O <sub>5</sub> Mg + K] <sup>+</sup>                | 931.499                                                               | 931.497        | 2.1                 | 7.0   |
|                                |                     |                                                                                                    |                                                                       |                |                     |       |
| <b>Carotenoids</b>             |                     |                                                                                                    |                                                                       |                |                     |       |
| Carotene                       | Car                 | [C <sub>40</sub> H <sub>56</sub> - C <sub>7</sub> H <sub>8</sub> ] <sup>+</sup>                    | 444.438                                                               | 444.431        | 15.8                | 52.7  |
| Lutein                         | Lut                 | [C <sub>40</sub> H <sub>56</sub> O <sub>2</sub> ] <sup>+</sup> **                                  | 568.428                                                               | 568.432        | 7.0                 | 23.3  |
| Loroxanthin                    | Lor                 | [C <sub>40</sub> H <sub>56</sub> O <sub>3</sub> ] <sup>+</sup> **                                  | 584.422                                                               | 584.427        | 8.6                 | 10.0  |
| Violaxanthin                   | Vio (I)             | [C <sub>40</sub> H <sub>53</sub> ] <sup>+</sup>                                                    | 583.617                                                               | 583.621        | 6.9                 | 12.6  |
|                                |                     | [C <sub>40</sub> H <sub>56</sub> O <sub>4</sub> ] <sup>+</sup> **                                  | 600.417                                                               | 600.421        | 6.7                 | 5.0   |
| <b>Lipids</b>                  |                     |                                                                                                    |                                                                       |                |                     |       |
| Ceramides                      | Cer(44:1;O4)        | [C <sub>44</sub> H <sub>87</sub> NO <sub>5</sub> + Na] <sup>+</sup>                                | 732.648                                                               | 732.629        | 25.9                | 7.2   |
| Diacylglycerols                | DG(22:2/22:2/0:0)   | [C <sub>47</sub> H <sub>84</sub> O <sub>5</sub> + Na] <sup>+</sup>                                 | 751.621                                                               | 751.632        | 14.6                | 6.9   |
|                                | PS(13:0/20:2)       | [C <sub>39</sub> H <sub>72</sub> NO <sub>10</sub> P + Na] <sup>+</sup>                             | 768.479                                                               | 768.491        | 15.6                | 9.5   |
|                                | Phosphatidylserines | PS(19:0/20:1)                                                                                      | [C <sub>45</sub> H <sub>86</sub> NO <sub>10</sub> P + H] <sup>+</sup> | 832.606        | 832.618             | 14.4  |
| Triacylglycerols               | TG(18:3/18:3/20:2)  | [C <sub>48</sub> H <sub>82</sub> NO <sub>10</sub> P + Na] <sup>+</sup>                             | 886.557                                                               | 886.552        | 5.6                 | 11.8  |
|                                |                     | [C <sub>59</sub> H <sub>98</sub> O <sub>6</sub> + Na] <sup>+</sup>                                 | 925.726                                                               | 925.719        | 7.6                 | 7.1   |
|                                | TG(16:0/20:0/20:0)  | [C <sub>59</sub> H <sub>114</sub> O <sub>6</sub> + Na] <sup>+</sup>                                | 941.851                                                               | 941.864        | 13.8                | 7.0   |

**Table S4** Compounds detected in *C. vulgaris* SFE extract by MALDI MS.

| Compound                      | Abbreviation         | Proposed formula                                                                 | <i>m/z Theo</i>                                                      | MALDI MS       |                     |       |       |
|-------------------------------|----------------------|----------------------------------------------------------------------------------|----------------------------------------------------------------------|----------------|---------------------|-------|-------|
|                               |                      |                                                                                  |                                                                      | <i>m/z Exp</i> | Mass accuracy (ppm) | S/N   |       |
| <b>Chlorophyll pigments</b>   |                      |                                                                                  |                                                                      |                |                     |       |       |
| Pheophytin <i>a</i>           | Phtn <i>a</i>        | [C <sub>55</sub> H <sub>74</sub> N <sub>4</sub> O <sub>5</sub> ] <sup>+</sup> ** | 870.565                                                              | 870.565        | 0.1                 | 129.6 |       |
| <b>Carotenoids</b>            |                      |                                                                                  |                                                                      |                |                     |       |       |
| Lutein                        | Lut (II)             | [C <sub>40</sub> H <sub>53</sub> ] <sup>+</sup>                                  | 533.428                                                              | 533.431        | 5.6                 | 7.8   |       |
|                               |                      | [C <sub>40</sub> H <sub>55</sub> O] <sup>+</sup>                                 | 551.428                                                              | 551.440        | 21.8                | 55.5  |       |
| Antheraxanthin                | Ante                 | [C <sub>40</sub> H <sub>55</sub> O <sub>2</sub> ] <sup>+</sup>                   | 567.422                                                              | 567.431        | 15.9                | 12.2  |       |
| <b>Lipids</b>                 |                      |                                                                                  |                                                                      |                |                     |       |       |
| Vitamin D3 and derivatives    | Vitamin D3 derivat   | [C <sub>29</sub> H <sub>44</sub> O <sub>3</sub> + Na] <sup>+</sup>               | 463.318                                                              | 463.311        | 16.8                | 39.6  |       |
|                               | Vitamin D3 diacetate | [C <sub>31</sub> H <sub>48</sub> O <sub>4</sub> + Na] <sup>+</sup>               | 507.345                                                              | 507.339        | 11.8                | 49.3  |       |
|                               | DipropylVitamin D3   | [C <sub>33</sub> H <sub>56</sub> O <sub>3</sub> + Na] <sup>+</sup>               | 523.412                                                              | 523.417        | 8.2                 | 57.7  |       |
| Diacylglycerophosphoglycerols | PG(10:0/10:0)        | [C <sub>26</sub> H <sub>51</sub> O <sub>10</sub> P + Na] <sup>+</sup>            | 577.311                                                              | 577.316        | 7.4                 | 7.3   |       |
|                               |                      | DG(12:0/20:0)                                                                    | [C <sub>35</sub> H <sub>68</sub> O <sub>5</sub> + Na] <sup>+</sup>   | 591.496        | 591.500             | 6.8   | 8.2   |
|                               |                      | DG(13:0/20:5)                                                                    | [C <sub>36</sub> H <sub>60</sub> O <sub>5</sub> + Na] <sup>+</sup>   | 595.433        | 595.431             | 3.4   | 42.8  |
| Diacylglycerols               | DG(dO-36:4)          | [C <sub>39</sub> H <sub>72</sub> O <sub>3</sub> + Na] <sup>+</sup>               | 611.537                                                              | 611.530        | 11.4                | 9.0   |       |
|                               |                      | DG(15:0/19:0)                                                                    | [C <sub>37</sub> H <sub>72</sub> O <sub>5</sub> + Na] <sup>+</sup>   | 619.527        | 619.535             | 12.9  | 16.7  |
|                               |                      | DG(13:0/22:6)                                                                    | [C <sub>38</sub> H <sub>62</sub> O <sub>5</sub> + Na] <sup>+</sup>   | 621.449        | 621.442             | 11.3  | 107.0 |
|                               |                      | PA(13:0/17:2)                                                                    | [C <sub>33</sub> H <sub>61</sub> O <sub>8</sub> P + Na] <sup>+</sup> | 639.400        | 639.400             | 0.2   | 29.7  |
| Diacylglycerophosphates       | PA(14:0/18:3)        | [C <sub>35</sub> H <sub>63</sub> O <sub>8</sub> P + Na] <sup>+</sup>             | 665.415                                                              | 665.411        | 6.0                 | 8.1   |       |
|                               |                      | PA(13:0/20:1)                                                                    | [C <sub>36</sub> H <sub>69</sub> O <sub>8</sub> P + Na] <sup>+</sup> | 683.462        | 683.450             | 17.6  | 14.2  |
| Phosphatidylserines           | PS(20:1/22:6)        | [C <sub>48</sub> H <sub>80</sub> NO <sub>10</sub> P + Na] <sup>+</sup>           | 812.541                                                              | 812.550        | 11.1                | 8.9   |       |
| Triacylglycerols              | TG(16:0/16:0/18:1)   | [C <sub>53</sub> H <sub>100</sub> O <sub>6</sub> + Na] <sup>+</sup>              | 855.741                                                              | 855.744        | 3.5                 | 23.9  |       |

|                    |                                                                     |         |         |      |      |
|--------------------|---------------------------------------------------------------------|---------|---------|------|------|
| TG(15:0/15:0/22:2) | [C <sub>55</sub> H <sub>102</sub> O <sub>6</sub> + Na] <sup>+</sup> | 881.757 | 881.748 | 10.2 | 12.3 |
| TG(14:1/19:0/19:0) | [C <sub>55</sub> H <sub>104</sub> O <sub>6</sub> + Na] <sup>+</sup> | 883.773 | 883.766 | 7.9  | 27.4 |
| TG(17:2/17:2/20:5) | [C <sub>57</sub> H <sub>92</sub> O <sub>6</sub> + Na] <sup>+</sup>  | 895.679 | 895.683 | 4.5  | 10.5 |
| TG(17:2/17:2/20:4) | [C <sub>57</sub> H <sub>94</sub> O <sub>6</sub> + Na] <sup>+</sup>  | 897.694 | 897.705 | 12.3 | 15.3 |
| TG(16:1/16:1/22:0) | [C <sub>57</sub> H <sub>106</sub> O <sub>6</sub> + Na] <sup>+</sup> | 909.788 | 909.783 | 5.5  | 7.3  |
| TG(16:0/17:1/21:0) | [C <sub>57</sub> H <sub>108</sub> O <sub>6</sub> + Na] <sup>+</sup> | 911.804 | 911.799 | 5.5  | 10.9 |
| TG(17:0/18:2/20:0) | [C <sub>58</sub> H <sub>108</sub> O <sub>6</sub> + Na] <sup>+</sup> | 923.804 | 923.794 | 10.8 | 6.0  |
| TG(18:3/18:3/20:2) | [C <sub>59</sub> H <sub>98</sub> O <sub>6</sub> + Na] <sup>+</sup>  | 925.761 | 925.763 | 2.2  | 6.2  |
